# Supplementary material for: Adverse effects of falciparum and vivax malaria and the safety of antimalarial treatment in early pregnancy: a population-based study
Source: PubMed Central journal article supplement (PMC3346948; doi:10.1016/s1473-3099(11)70339-5), 2012-05
Supplement: mmc1.pdf [file mmc1.pdf]

## Supplementary webappendix

This webappendix formed part of the original submission and has been peer reviewed. We post it as supplied by the authors.

Supplement to: McGready R, Lee SJ, Wiladphaingern J, et al. Adverse effects of falciparum and vivax malaria and the safety of antimalarial treatment in early pregnancy: a population-based study. *Lancet Infect Dis* 2011; published online Dec 13. DOI:10.1016/S1473-3099(11)70339-5.

**Supplementary Table:**

**Table 1**

**Characteristics of women included and excluded from the analysis (n=48,426)**

| Characteristic                       | Included<br>N=17,613       | Excluded<br>N=30,813       |
|--------------------------------------|----------------------------|----------------------------|
| Age, yrs, mean $\pm$ SD, [range]     | 27 $\pm$ 7 (21-32) [13-52] | 26 $\pm$ 7 (20-30) [13-50] |
| Teenager < 20 y.o., n (%)            | 2605/17,612 (14.8)         | 4245/30,704 (17.1)         |
| Gravidity, median (IQ range) [range] | 3 (2-5) [1-17]             | 3 (1-4) [1-19]             |
| Parity, median (IQ range) [range]    | 2 (1-3) [0-13]             | 2 (0-3) [0-17]             |
| Primigravidae, n (%)                 | 3,626/17,585 (20.6)        | 8,352/30,615 (27.3)        |
| Smokers, n (%)                       | 4320/14,390 (30.0)         | 6,435/20,512(31.4)         |

IQ range – inter-quartile range; SD - standard deviation.

Missing data: Age and teenager n=110, primigravidae n=226, parity n=226, gravidity n=244, smoking n=13,524 .

**Table 2**

**Characteristics of women with known and unknown outcomes of pregnancy presenting in the first trimester (with no malaria or a single first trimester episode of malaria).**

| Characteristic                                 | Unknown outcome<br>N=2,376 | Known outcome<br>N=17,613 | P-value |
|------------------------------------------------|----------------------------|---------------------------|---------|
| Age, yrs, mean $\pm$ SD, [range]               | 26 $\pm$ 7 [13-46]         | 27 $\pm$ 7 [13-52]        | <0.001  |
| Teenager < 20 y.o., n (%)                      | 434/2,376 (18.3)           | 2605/17,612 (14.8)        | <0.001  |
| Gravidity, median (IQ range) [range]           | 2 (1-4) [1-16]             | 3 (2-5) [1-17]            | <0.001  |
| Parity, median (IQ range) [range]              | 1 (0-3) [0-13]             | 2 (1-3) [0-13]            | <0.001  |
| Primigravidae, n (%)                           | 738/2,376 (31.1)           | 3,626/17,585 (20.6)       | <0.001  |
| Smokers, n (%)                                 | 619/2,270 (27.3)           | 4,320/14,390 (30.0)       | 0.008   |
| Malaria 1 <sup>st</sup> trimester, n (%)       | 363/2,376 (15.3)           | 945/17,613 (5.4)          | <0.001  |
| Signs of pregnancy loss at presentation, n (%) | 219/2,370 (8.9)            | 1196/17,613 (6.8)         | <0.001  |
| <b>Antimalarial Treatment</b>                  |                            |                           |         |
| Chloroquine                                    | 153/363 (42.1)             | 429/945 (45.4)            | 0.025   |
| Quinine                                        | 168/363 (46.3)             | 390/945 (41.3)            |         |
| Artesunate                                     | 36/363 (9.9)               | 92/945 (9.7)              |         |
| Mefloquine                                     | 3/363 (0.3)                | 32/945 (3.4)              |         |
| Other                                          | 3/363 (0.8)                | 2/945 (0.2)               |         |

SD-standard deviation; IQ range-inter-quartile range;

Missing data: Teenager n=1, primigravidae n=28, parity n=37, gravidity n=28, smoking n=3329, signs of pregnancy loss at first consultation n= 6.

**Table 3.**  
**Congenital abnormalities in the first trimester, single treatments.**

| <b>Treatment</b> | <b>Age yrs</b> | <b>Gravidity (G) Parity (P)</b> | <b>EGA malaria treatment, wks</b> | <b>Abnormality</b>                                               | <b>Critical period of organ formation</b> | <b>Proportion of abnormality in women treated with antimalarial</b> | <b>Proportion of same abnormality in women with no antimalarial treatment</b> |
|------------------|----------------|---------------------------------|-----------------------------------|------------------------------------------------------------------|-------------------------------------------|---------------------------------------------------------------------|-------------------------------------------------------------------------------|
| Artesunate       | 33             | G7 P4                           | 12.5                              | Syndactyly foot - digits fused bilateral 2, 3 and 4 no toe nails | Toe nails week 14                         | 2.3<br>(1/44)                                                       | 2.5<br>(5/198)                                                                |
| Artesunate       | 21             | G1 P0                           | 3.9                               | Hydrocephalus                                                    | Brain 3-16 wks                            | 2.3<br>(1/44)                                                       | 3.0<br>(6/198)                                                                |
| Quinine          | 20             | G2 P1                           | 9.7                               | Cleft lip and palate                                             | Palate- 6-8 wks                           | 0.4<br>(1/258)                                                      | 12.6<br>(25/198)                                                              |
| Chloroquine      | 25             | G3 P2                           | 13                                | Arthrogyriposis                                                  | Limb rotation 8 wks                       | 0.4<br>(1/260)                                                      | 1.0<br>(2/198)                                                                |

EGA – estimated gestational age.
